# Supplementary material for: Trochleoplasty Provides Good Outcomes for Recurrent Patellofemoral Dislocations with No Clear Superiority across Different Techniques
Source: MDPI journal article supplement (doi:10.3390/jcm13103009), 2024-05-20
Supplement: s1 [file s1]

## Supplementary material

Supplementary Table S1: Inclusion and exclusion criteria of the studies included in the

| Author    | Year | Inclusion Criteria                                                                                                                                                                                                                                                                                                                  | Exclusion Criteria                                                                                                                                                                                                                                                 |
|-----------|------|-------------------------------------------------------------------------------------------------------------------------------------------------------------------------------------------------------------------------------------------------------------------------------------------------------------------------------------|--------------------------------------------------------------------------------------------------------------------------------------------------------------------------------------------------------------------------------------------------------------------|
| Banke     | 2014 | History of two or more patellar redislocations with a persistent positive apprehension sign from extension to 60 of flexion and a concomitant approval of trochlear dysplasia type B, C or D in the axial MRI undergoing trochleoplasty in combination with MPFLR by one surgeon (senior author)                                    | Age below 15 years<br>Open epiphyseal plates<br>Pregnancy<br>Previous ligamentous surgeries at the affected knee<br>Patellofemoral arthritis<br>rheumatic arthritis<br>Habitual patella dislocation during the complete range of motion due to femoral malrotation |
| Blønd     | 2014 | Patients with RPD and TD type B to D<br>Positive patella apprehension sign at a minimum of 20 flexion                                                                                                                                                                                                                               | None                                                                                                                                                                                                                                                               |
| Camathias | 2016 | Adolescent patient aged 10 to 20 years<br>Recurrent patellar dislocations not responding to at least 6 months of nonoperative treatment, minimum type B dysplasia<br>closed or closing physes (grade V or VI according with grade V indicating <5 mm on any single section on MRI and grade VI indicating completely fused physis). | Previous lower limb operations<br>Systemic diseases<br>Open physis (less than grade V)<br>Patient with additional surgical interventions (osteotomies for torsional or valgus/varus correction)                                                                    |
| Dejour    | 2013 | Skeletally mature patients with recurrent patellar dislocation<br>Presence of trochlear dysplasia<br>History of previous surgery for the treatment of patellar dislocation                                                                                                                                                          | Patients with patellofemoral arthritis<br>Patients with patellofemoral pain syndrome with no documented patellar dislocation                                                                                                                                       |
| Donell    | 2006 | Patients with recurrent dislocation of the patella with severe trochlear dysplasia                                                                                                                                                                                                                                                  | None                                                                                                                                                                                                                                                               |
| Falkowski | 2017 | Patients with clinical diagnosis of patellar instability, as determined by review of clinical records, who received MRI before and after surgery for treatment of patellar instability                                                                                                                                              | None                                                                                                                                                                                                                                                               |
| Fucentese | 2011 | Trochleoplasty performed for patients with two or more patellar dislocations, or one patellar dislocation with a persistently positive patellar apprehension sign for more than 1 year in the presence of radiologically confirmed trochlear dysplasia                                                                              | Radiological signs of arthritic degeneration of the patellofemoral joint<br>Open epiphyseal plates                                                                                                                                                                 |

|              |      |                                                                                                                                                                                                                                                                                                                                                                                                       |                                                                                                                                                                                                                                                                  |
|--------------|------|-------------------------------------------------------------------------------------------------------------------------------------------------------------------------------------------------------------------------------------------------------------------------------------------------------------------------------------------------------------------------------------------------------|------------------------------------------------------------------------------------------------------------------------------------------------------------------------------------------------------------------------------------------------------------------|
| Koëter       | 2007 | Patients with objective patellar instability due to isolated trochlear dysplasia (as established on a true lateral radiograph) and closed epiphysis                                                                                                                                                                                                                                                   | Patients with instability due to patella alta, high Q angle, genu valgum, VMO dysplasia were treated with different operations                                                                                                                                   |
| McNamara     | 2015 | Patients with recurrent symptomatic patellar instability, with at least 1 documented dislocation of the patella that had either failed physical therapy and/or a previous patellar stabilization procedure(s), with severe trochlear dysplasia as defined on a lateral plain radiograph with a boss height of 4 mm                                                                                    | Patellofemoral arthritis<br>Patients who underwent a different type of trochleoplasty procedure (Bereiter, n = 2; modified Albee, n = 1; excision, n = 3)                                                                                                        |
| Metcalfe     | 2017 | Recurrent patellar instability (the sole clinical indication) and severe trochlear dysplasia (the sole radiological indication)                                                                                                                                                                                                                                                                       | None                                                                                                                                                                                                                                                             |
| Nelitz       | 2013 | Patients with severe trochlear dysplasia who had experienced at least 2 recurrent dislocations of the patella despite a nonoperative treatment program                                                                                                                                                                                                                                                | Patients with a tibial tubercle–trochlear groove (TT-TG) distance >2.2 cm<br>International Cartilage Repair Society (ICRS) grade III or IV degenerative changes of the femoral trochlear cartilage<br>Patients who had additional varization osteotomy performed |
| Neumann      | 2016 | Patients with repetitive but a minimum of two patella luxations<br>Previous non-operative treatment without clinical or subjective improvement, and reports of continual discomfort, pain, and instability of the affected knee joint<br>Patients with symptomatic but mild trochlear dysplasia                                                                                                       | Incomplete clinical and/or radiographic medical charts<br>Unavailability for follow-up in outpatient clinic                                                                                                                                                      |
| Ntagiopoulos | 2013 | Patients with more than 3 documented episodes of patellar dislocation with high-grade trochlear dysplasia type B or D according to the Dejour classification<br>No previous patellofemoral surgery<br>Pathological lateral patellar glide test using the quadrant test (the patella can be shifted by 3 or more quadrants laterally by the examiner with the patient's knee placed at full extension) | Patients with open growth plates, patellofemoral arthritis, or patellofemoral pain syndrome with no true dislocation                                                                                                                                             |
| Pesenti      | 2017 | Presence of habitual or permanent patellar dislocations, which were radiographically documented, related to a grade B trochlear dysplasia                                                                                                                                                                                                                                                             | None                                                                                                                                                                                                                                                             |

|                |      |                                                                                                                                                                                                                                                                                                        |                                                                                                                                                                                                 |
|----------------|------|--------------------------------------------------------------------------------------------------------------------------------------------------------------------------------------------------------------------------------------------------------------------------------------------------------|-------------------------------------------------------------------------------------------------------------------------------------------------------------------------------------------------|
| Rouanet        | 2015 | Patients who presented with objective (patellofemoral dislocations) or subjective (apprehension without dislocation) patellofemoral instability associated with trochlear dysplasia                                                                                                                    | Adolescents with open growth plates<br>Painful patellar syndromes without clinical instability<br>Iwanoet al.'s stage $\geq 2$ patellofemoral osteoarthritis                                    |
| Schöttle       | 2005 | 2 or more patellar dislocations<br>1 patellar dislocation with a persistent Fairbank's apprehension sign of more than 1 year in the presence of all radiological signs of trochlear dysplasia                                                                                                          | Degenerative deformation of the trochlea<br>Open epiphyseal plates                                                                                                                              |
| Thaunat        | 2011 | Patellofemoral instability defined by recurrent subluxations or recurrent dislocations associated with dysplasia of the femoral trochlea.<br>Persistent retropatellar pain and crepitus due to trochlear dysplasia<br>Apprehension without dislocation<br>Failure to respond to conservative treatment | None                                                                                                                                                                                            |
| Utting         | 2008 | Patellofemoral instability or chronic dislocation associated with dysplasia of the femoral trochlea                                                                                                                                                                                                    | None                                                                                                                                                                                            |
| Verdonk        | 2005 | Persistent retropatellar pain and crepitus due to trochleodyplasia, whether or not in combination with patella alta<br>Recurrent patellar dislocations                                                                                                                                                 | None                                                                                                                                                                                            |
| von Engelhardt | 2017 | Patients who underwent surgery with a combination of trochleoplasty and MPFL reconstruction with clear positive patella apprehension sign prior to surgery                                                                                                                                             | Additional surgeries such as corrections of the knee rotation and/or axis, tibial tuberosity transfers, etc.<br>Patients with advanced osteoarthritic changes<br>Previous fractures of the knee |
| von Knoch      | 2006 | Recurrent patellar dislocation in the presence of a positive Fairbank's apprehension sign<br>Confirmation of trochlear dysplasia on radiographs                                                                                                                                                        | Open epiphyseal growth plates<br>Pronounced degenerative changes of the trochlea despite patellofemoral instability in association with trochlear dysplasia                                     |

MPFLR: medial patellofemoral ligament reconstruction

MRI: Magnetic Resonance Imaging

RPD: Recurrent patella dislocation

TD: trochlear dysplasia
